# Supplementary material for: Color vision varies more among populations than among species of live-bearing fish from South America
Source: PubMed Central journal article supplement (PMC4609137; doi:10.1186/s12862-015-0501-3), 2015-10-16
Supplement: 12862_2015_501_MOESM1_ESM.pdf [file 12862_2015_501_MOESM1_ESM.pdf]

# Field Sites

© ZeeMaps

Data © OpenStreetMap contributors

16 km

8 m

Georgetown

ESSEQUIBO  
ISLANDS-WEST  
DEMERARA  
REGION

DEMERARA-MAHAICA  
REGION

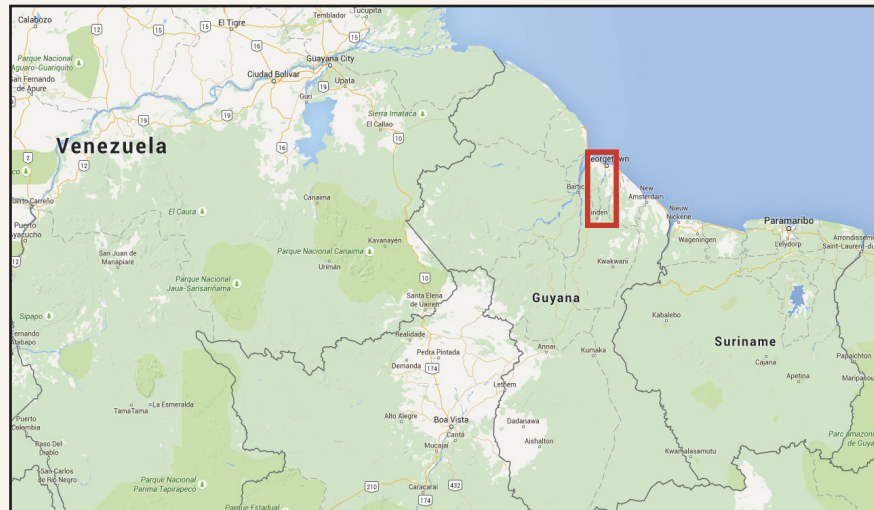

Linden

1. Patentia 2. Princess Cemetery 3. Seawall Trench 4. Turkeyen 5. West Watuka (*Poecilia bifurca*)
