# Supplementary material for: Color vision varies more among populations than among species of live-bearing fish from South America
Source: PubMed Central journal article supplement (PMC4609137; doi:10.1186/s12862-015-0501-3), 2015-10-16
Supplement: 12862_2015_501_MOESM2_ESM.pdf [file 12862_2015_501_MOESM2_ESM.pdf]

Supplementary Table S2. Relative and absolute efficiency (% efficiency) of qPCR assays.

|           | Forward Primer             | Probe                                   | Reverse Primer                 | Product Length | Relative Efficiency | Standard Error | Absolute Efficiency |
|-----------|----------------------------|-----------------------------------------|--------------------------------|----------------|---------------------|----------------|---------------------|
| B-actin   | GCTTGTGCGGGATATCA<br>TTTG  | CCCACACCCAAAGTTCA<br>GCCATG             | GTATGTGCAAAGCCGG<br>ATTC       | 137            | 0.7593              | 0.0114         | 0.7063              |
| COI       | GCCCACTTCCACTATGT<br>TCTC  | ATAGGAGCCGTCTTTGC<br>CATTGTTGC          | CACTACACAGCACCTGA<br>ACA       | 108            | 0.5462              | 0.0126         | 0.5080              |
| LWS-1     | GAGCTGAGAAACCTTCT<br>TT    | ATGGCAGAGGAATGGG<br>GAAAACA             | GCTGTTTGTGTATGTGA<br>ATGC      | 116            | 0.7056              | 0.0173         | 0.6564              |
| LWS-2     | CAATGTGTGTCTTTGAA<br>GGCTA | GTTGTCTCAATTTGTGG<br>AATTGCTGGGC        | CAAACCTTGACATTTCCA<br>AAGGG    | 123            | 0.8685              | 0.0144         | 0.8079              |
| LWS-3     | CAGAGGAAGGTGTGAC<br>AG     | ATGGCAGAGGAATGGG<br>GAAAACA             | GCTGTTTGTGTATGTGA<br>ATGC      | 131            | 0.9694              | 0.0146         | 0.9018              |
| LWS-R     | GGGCTCTGCTTTTCACAT<br>AC   | CATACAAGAGATCCTTT<br>TGAGGGACCAAACACTAC | CCAAGACCAGACCATTT<br>GTG       | 155            | 0.6412              | 0.0117         | 0.5965              |
| Myosin HC | TCTCTGCTCACCTTCAA<br>CTTC  | CCAGTTCTCGGACCCTC<br>TGCT               | CAGATCCTTGACTGTAA<br>CCTCG     | 136            | 0.5303              | 0.0136         | 0.4933              |
| RH1       | CTGGTTTGCTGGATACC<br>TTAC  | CCAGTGTGGCCTGGTA<br>CATCTTCAC           | GCTTGTTTCATGCAGATG<br>TAGATC   | 151            | 0.6168              | 0.0131         | 0.574               |
| RH2-1     | ACCATCACATCTGCTCT<br>TAA   | GCTATTGAGGGATTCAT<br>GGCAACACT          | AACAACCAGAGACCAGA<br>GAG       | 111            | 0.6637              | 0.0139         | 0.6174              |
| RH2-2     | TAGGCTGTGATATGGAA<br>GGT   | GGAGGTCAAGTATCACT<br>ATGGTCTCTTGT       | CCACTATGTATCTCTCA<br>ATAGCTAAG | 93             | 0.8852              | 0.0258         | 0.8235              |
| SWS1      | GCGTTCTTCTCCAAGAG<br>C     | ACAAACAGTTCAATGCC<br>TGCATCATGG         | GTGGACACCTCAGTCTT<br>TGA       | 146            | 0.6268              | 0.0164         | 0.5831              |
| SWS2A     | CCATCCTGCCTGTGCGAA<br>G    | AGTCCTCAATAAGCAGT<br>TTCGAACATGCATG     | GTCACTGACTGAGTTGT<br>AGAGAC    | 140            | 0.9737              | 0.0263         | 0.9015              |
| SWS2B     | TCCTGTGTCTCAAAAGC<br>CTC   | ACGTTCTCCTCAATAAG<br>CAGTTCCGC          | CACTCATCCCCAGCATC<br>TTC       | 100            | 0.7110              | 0.0167         | 0.6614              |

Supplementary Table S3. PCR and sequencing primers used for LWS-1 180 Ala/Ser allele identification.

|            | Forward               | Reverse                 |
|------------|-----------------------|-------------------------|
| PCR        | TGTGAAGTGCAGATCACCTAG | ACACATTCATGCATGATGCAG   |
| Sequencing | GATCCCTTTGAAGGACCAAAC | GGACAATCATGTAGGACAGGACC |
